# Supplementary material for: Graphene/nitrogen-doped porous carbon sandwiches for the metal-free oxygen reduction reaction: conductivity versus active sites
Source: Royal Society of Chemistry journal article supplement (doi:10.1039/c6ta04578b), 2016-01-01
Supplement: c6ta04578b1.pdf [file c6ta04578b1.pdf]

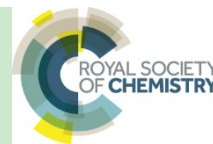

Journal Name

ARTICLE

## Supporting Information

### **Graphene/Nitrogen-Doped Porous Carbon Sandwiches for Metal-Free Oxygen Reduction Reaction: Conductivity versus Active Sites**

*M. Qiao<sup>1,‡</sup>, C. Tang<sup>1, 2,‡</sup>, G. He<sup>3</sup>, K. Qiu<sup>3</sup>, R. Binions<sup>1, 4</sup>, I. Parkin<sup>3</sup>, Q. Zhang<sup>1,2</sup>, Z. Guo<sup>3</sup> and M. M. Titirici<sup>1,4\*</sup>*

1 School of Engineering and Materials Science, Queen Mary University of London, London, E1 4NS, UK

2 Beijing Key Laboratory of Green Chemical Reaction Engineering, Department of Chemical Engineering, Tsinghua University, Beijing, 100084, China

3 Materials Chemistry Centre, Department of Chemistry, University College London, London, WC1H 0AJ, UK

4 Materials Research Institute, Queen Mary University of London, London, E1 4NS, UK

<sup>‡</sup> M. Qiao and C. Tang contribute equally to this work.

Journal Name

ARTICLE

## Supplementary figures

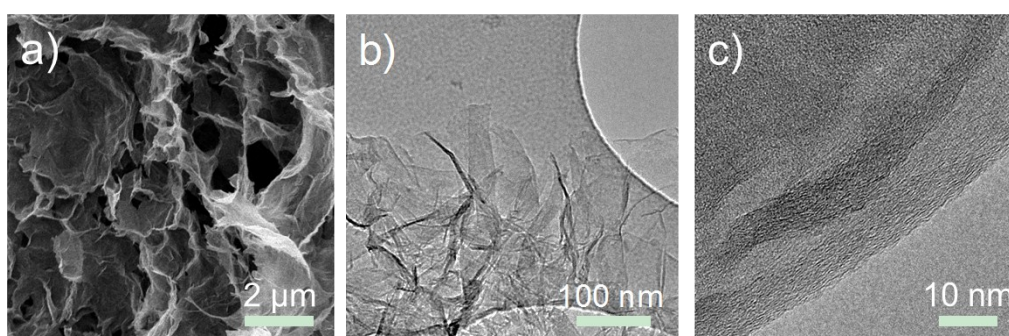

**Fig. S1** (a) SEM image and (b, c) TEM images of rGO obtained after HTC and high-temperature annealing.

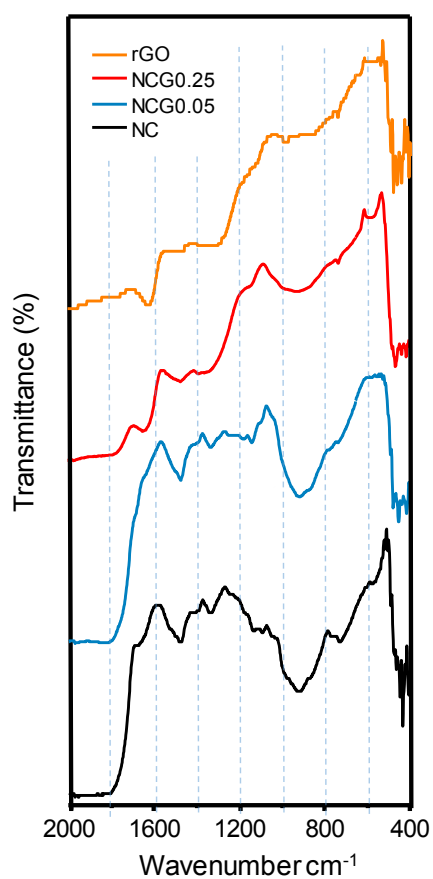

**Fig. S2** FTIR spectra of NC, NCG0.05, NCG0.25 and rGO

Journal Name

ARTICLE

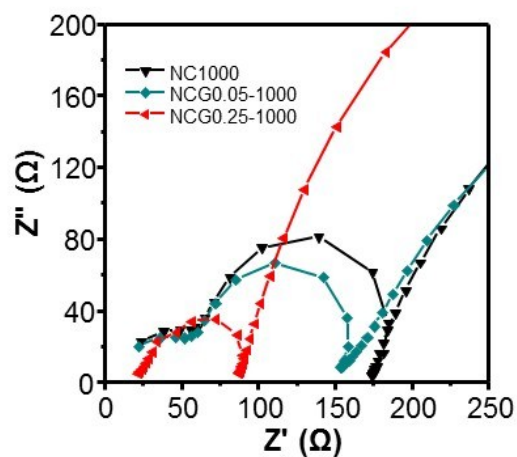

Fig. S3 Electrical conductivity of different samples measured by the impedance

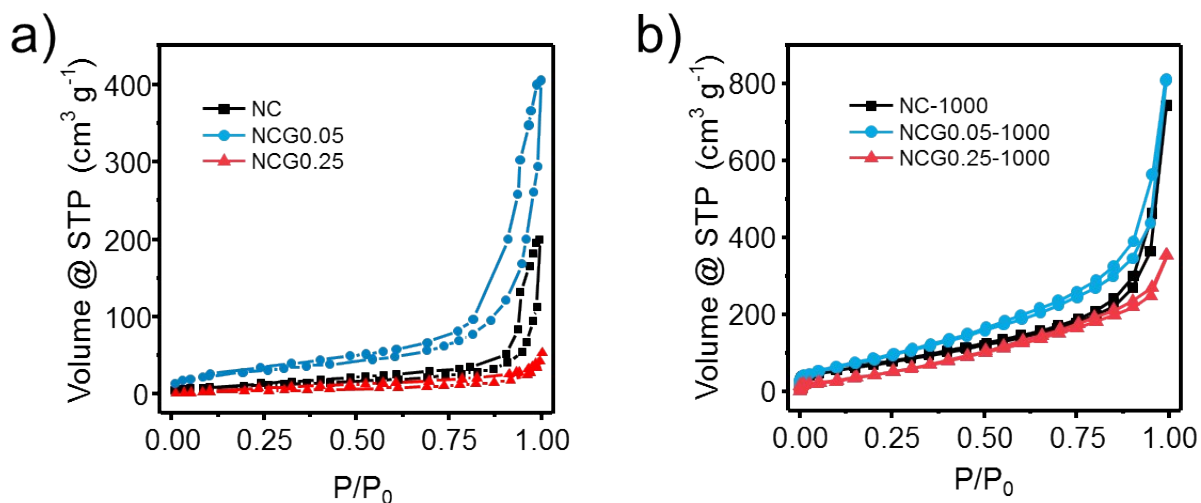

Fig. S4 The  $N_2$  sorption isotherms of samples obtained after (a) HTC and (b) high-temperature annealing.

Journal Name

ARTICLE

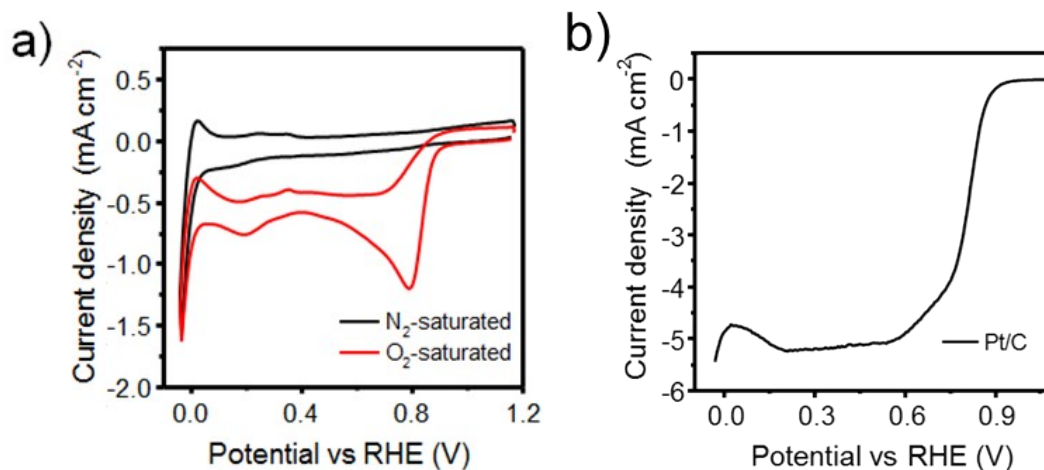

Fig. S5 (a) CV and (b) LSV curves of Pt/C catalyst.

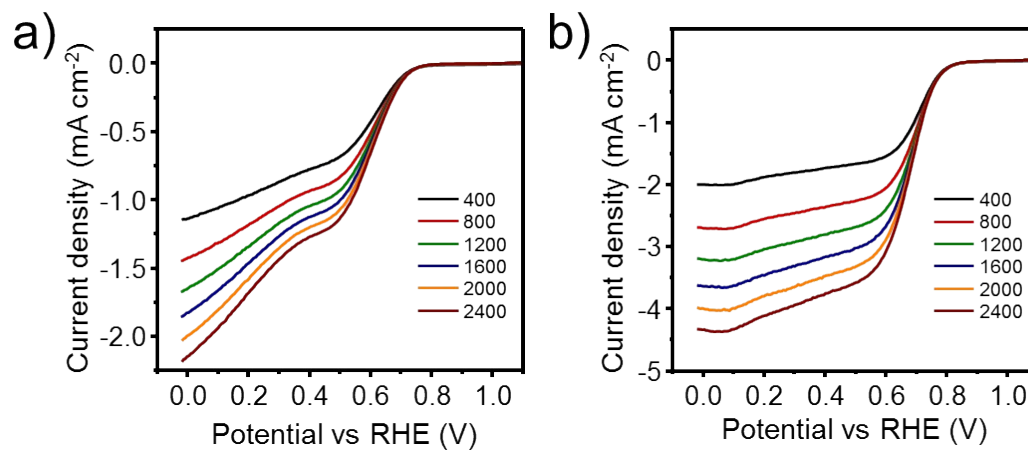

Fig. S6 LSV curves of (a) NCG0.25 and (b) NC-1000 at different rotating speeds of 400, 800, 1200, 1600, 2000, and 2400 rpm, respectively.

Journal Name

ARTICLE

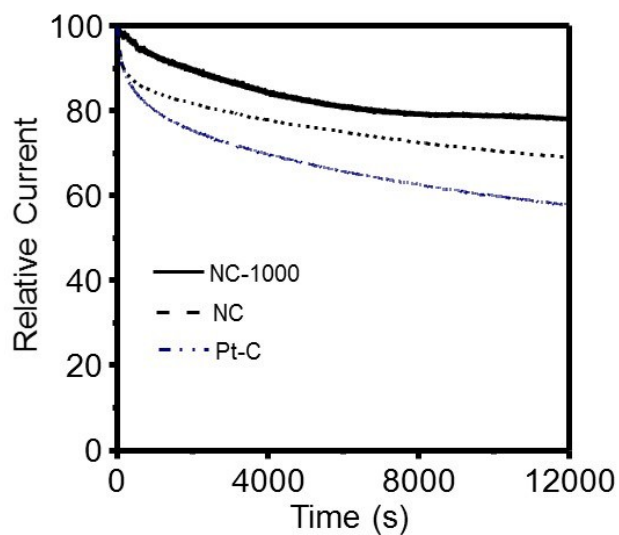

**Fig. S7** Current–time chronoamperometric responses of NC-1000, NC and Pt-C measured at peak potential in CV curves as shown in Fig. 4a.

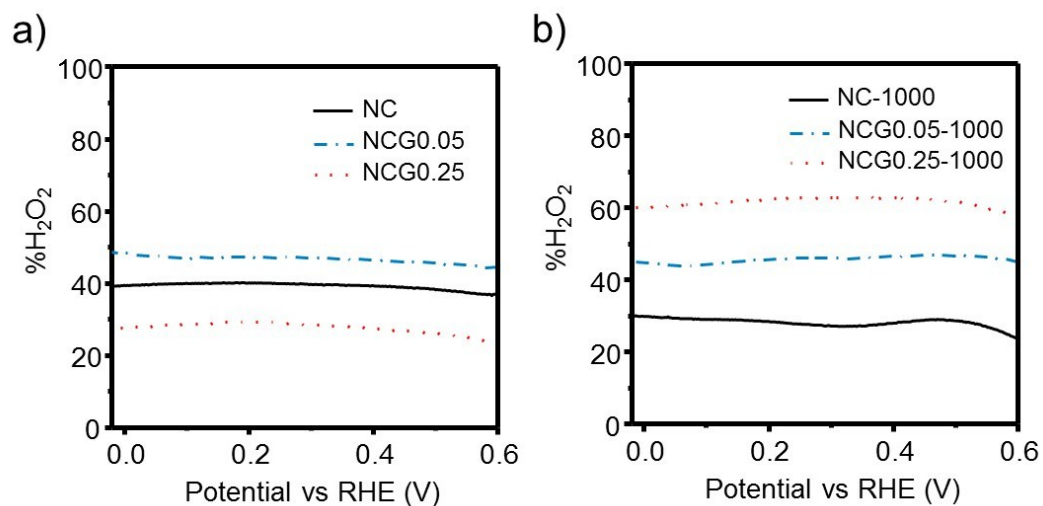

**Fig. S8** Peroxide yields of (a) NC, NCG0.05, NCG0.25 and (b) NC-1000, NCG0.05-1000, NCG0.25-1000 in 0.1M KOH at rotating speed of 1600 rpm.

Journal Name

ARTICLE

## Supplementary tables

Table S1 Mass record of different samples during fabrication.

|         | GO<br>(mg) | Chitosan<br>(mg) | Monocomponent-calculated<br>yield (mg) <sup>[a]</sup> |                  |         | Experimental yield<br>(mg) |
|---------|------------|------------------|-------------------------------------------------------|------------------|---------|----------------------------|
|         |            |                  | rGO                                                   | HTC-<br>chitosan | Product |                            |
| GO      | 60         | 0                | 25.9                                                  | 0                | 25.9    | 25.9                       |
| NC      | 0          | 1200             | 0                                                     | 372.0            | 372.0   | 372.0                      |
| NCG0.25 | 60         | 180              | 25.9                                                  | 55.8             | 81.7    | 122.6                      |
| NCG0.05 | 60         | 1200             | 25.9                                                  | 372.0            | 397.9   | 672.4                      |

a) The monocomponent-calculated yield was calculated based on the yield of chitosan and GO in monocomponent HTC systems. Experimental yield refers to the mass of product obtained in the actual experiment.

Journal Name

ARTICLE

**Table S2** XPS results of different samples.

| Sample       | Atom Species (at. %) |       |      |             |           |              |            |
|--------------|----------------------|-------|------|-------------|-----------|--------------|------------|
|              | C                    | O     | N    | Pyridinic-N | Pyrolic-N | Quaternary-N | Oxidized-N |
| NC           | 75.16                | 21.39 | 3.45 | 1.27        | 1.38      | 0.79         | -          |
| NCG0.05      | 76.13                | 18.22 | 5.65 | 1.49        | 2.97      | 1.19         | -          |
| NCG0.25      | 80.97                | 15.01 | 4.02 | 1.08        | 2.15      | 0.79         | -          |
| NC-1000      | 90.87                | 7.45  | 1.68 | 0.47        | -         | 0.97         | 0.24       |
| NCG0.05-1000 | 96.48                | 2.04  | 1.48 | 0.26        | -         | 0.98         | 0.23       |
| NCG0.25-1000 | 94.39                | 4.39  | 1.22 | 0.17        | -         | 0.84         | 0.21       |

Journal Name

ARTICLE

**Table S3** Specific surface area and total pore volume of different samples.

| Sample                                         | NC  | NCG0.05 | NCG0.25 | NC-1000 | NCG0.05-1000 | NCG0.25-1000 |
|------------------------------------------------|-----|---------|---------|---------|--------------|--------------|
| SSA (m <sup>2</sup> g <sup>-1</sup> )          | 36  | 99      | 25      | 278.9   | 339          | 223          |
| Pore volume (cm <sup>3</sup> g <sup>-1</sup> ) | 0.1 | 0.34    | 0.06    | 0.81    | 0.91         | 0.43         |

**Table S4** The ORR peak potential and peak current density in CV curves as shown in Fig. 4a.

| Sample       | Peak potential vs RHE (mV) | Peak current density (mA cm <sup>-2</sup> ) |
|--------------|----------------------------|---------------------------------------------|
| NC           | 504                        | 0.539                                       |
| NCG0.05      | 498                        | 0.425                                       |
| NCG0.25      | 552                        | 0.590                                       |
| NC-1000      | 689                        | 1.152                                       |
| NCG0.05-1000 | 606                        | 1.059                                       |
| NCG0.25-1000 | 558                        | 0.924                                       |

**Table S5** ORR activity observed from the LSV curves in Fig. 4b.

|                       | NC  | NCG0.05 | NCG0.25 | NC-1000 | NCG0.05-1000 | NCG0.25-1000 |
|-----------------------|-----|---------|---------|---------|--------------|--------------|
| Onset potential* (mV) | 832 | 839     | 922     | 993     | 987          | 844          |



**Journal Name**

## ARTICLE

|                        |      |      |      |      |      |      |
|------------------------|------|------|------|------|------|------|
| Saturated              |      |      |      |      |      |      |
| current                |      |      |      |      |      |      |
| density                | 1.57 | 1.75 | 1.85 | 3.61 | 3.39 | 3.15 |
| (mA cm <sup>-2</sup> ) |      |      |      |      |      |      |
| Half wave              |      |      |      |      |      |      |
| potential              | 340  | 357  | 524  | 666  | 600  | 363  |
| (mV)                   |      |      |      |      |      |      |

---

\* The onset potential is determined as the potential required for a current density of  $-2 \mu\text{A cm}^{-2}$  (vs. RHE)
